# Supplementary material for: Bioinformatics Analysis and Functional Characterization of the CFEM Proteins of Metarhizium anisopliae
Source: MDPI journal article supplement (doi:10.3390/jof8070661), 2022-06-24
Supplement: s1 [file s1]

Supplementary Table S2: GPI-anchor site predict of MaCFEM candidate effectors

| protein name | omega-site<br>position | Specificity | GPI-anchored |
|--------------|------------------------|-------------|--------------|
| MaCFEM81     | 277                    | 100.00%     | yes          |
| MaCFEM85     | 147                    | 99.90%      | yes          |
| MaCFEM87     | 138                    | 99.90%      | yes          |
| MaCFEM88     | 85                     | 95.70%      | no           |
| MaCFEM89     | 134                    | 100.00%     | yes          |
| MaCFEM90     | 165                    | 99.90%      | yes          |
