# Supplementary material for: Bioinformatics Analysis and Functional Characterization of the CFEM Proteins of Metarhizium anisopliae
Source: MDPI journal article supplement (doi:10.3390/jof8070661), 2022-06-24
Supplement: s1 [file s1]

### Gene cloning primers

|          |                          |
|----------|--------------------------|
| CFEM80-F | ATGCGGTTCCCCATCAGC       |
| CFEM80-R | TCACTGTTTGGCCTCGGACT     |
| CFEM81-F | ATGAAGTCGGCTGCCTTC       |
| CFEM81-R | TTAGATGAGGAGAGCGGC       |
| CFEM82-F | ATGCGGGTTCCTTTTCAAG      |
| CFEM82-R | CTATCCCTCTGCATGCTTTTGC   |
| CFEM83-F | ATGGGTCTGACTTTTACCGCT    |
| CFEM83-R | TTACACCAAGGTCCTAGGCT     |
| CFEM84-F | ATGCGGCCAT TGGTTCTCAC    |
| CFEM84-R | CTACAGAGCC AGAGCGAG      |
| CFEM85-F | ATGCGATCCTCATTCGTCACCTTG |
| CFEM85-R | TTAGAGAGCGGCAACGATGG     |
| CFEM86-F | ATGATGCCTCTGTCCATC       |
| CFEM86-R | TTATGGTCCCGGCGTAG        |
| CFEM87-F | ATGAAGTCAACTCTGC         |
| CFEM87-R | CTACAGGGCAGCCAACAGCC CG  |
| CFEM88-F | ATGAAGCTTACCGCTGTTCTCG   |
| CFEM88-R | TCAAAGTCCCTTCTCGATCCTG   |
| CFEM89-F | ATGAAGTTCCTCGCCATTGCATC  |
| CFEM89-R | TCACAGAGCCAACGCCGCG      |
| CFEM90-F | ATGAAGTTCACTGCTGTCGCTGC  |
| CFEM90-R | TTAGAGAGCCAGGGCACCGAT    |
| CFEM91-F | ATGCGATTGCCATTTTGG       |
| CFEM91-R | TCAACCCCTTCCAGGT         |
| CFEM92-F | ATGAAGTCTGCTCTTTCTGT TG  |
| CFEM92-R | TTACAGAGCGGCGACGAAAG     |

### qPCR primers

|            |                         |
|------------|-------------------------|
| Try -F     | TTGCAATGCATGTTTGATGTC   |
| Try -R     | CAAAGAGTGGTATCGAGTTAC   |
| q CFEM81-F | GCAGCGAACAAGATGTCAA     |
| q CFEM81-R | ACCGCCAGTAGCACTATGAG    |
| q CFEM85-F | CAGCTCGGCGAAATCCCCTCAT  |
| q CFEM85-R | TGGGAGTGTCGACGCCGCTG    |
| q CFEM87-F | CCCGAGTGCTCTCTGAAGTGTC  |
| q CFEM87-R | TGAGCAGTGGCAGCAGCACAG   |
| q CFEM88-F | CCGCTGTTCTCGTCGCCATCTG  |
| q CFEM88-R | CCCTCTTGTGGATGCAGCCGC   |
| q CFEM89-F | GCCTCGCCGACCTGCCCAG     |
| q CFEM89-R | GACGTGCCGGTGTTGCTGCC    |
| q CFEM90-F | GTTCACTGCTGTCGCTGCTATC  |
| q CFEM90-R | CGCAACTGGTAGCAGCACTCTGG |

### signal peptide assay primers

|                |                                      |
|----------------|--------------------------------------|
| pSuc- CFEM81-F | GGAATTTTAATTAAGAATTCATGAAGTCGGCTGCC  |
| pSuc- CFEM81-R | CTATAGGGAGAACCTCGAGGCACTTAGCGAGGGC   |
| pSuc- CFEM85-F | GGAATTTTAATTAAGAATTCATGCGATCCTCATT   |
| pSuc- CFEM85-R | CTATAGGGAGAACCTCGAGCTGCTGTGCGGCTGC   |
| pSuc- CFEM87-F | GGAATTTTAATTAAGAATTCATGAAGTCAACTCTGC |
| pSuc- CFEM87-R | CTATAGGGAGAACCTCGAGTCTGTTCTGCGCGAC   |
| pSuc- CFEM88-F | GGAATTTTAATTAAGAATTCATGAAGCTTACCGCTG |
| pSuc- CFEM88-R | CTATAGGGAGAACCTCGAGGACGGCGGCGGAGGT   |
| pSuc- CFEM89-F | GGAATTTTAATTAAGAATTCATGAAGTTCCTCGCC  |
| pSuc- CFEM89-R | CTATAGGGAGAACCTCGAGCAGGTCGGCGAGGCT   |
| pSuc- CFEM90-F | GGAATTTTAATTAAGAATTCATGAAGTTCACTGCT  |
| pSuc- CFEM90-R | CTATAGGGAGAACCTCGAGGCTCTGAGCCGAGAC   |

### HR assay primers

|               |                                           |
|---------------|-------------------------------------------|
| PYBA-CFEM81-F | caATTGGAGCTCCACCGCATGAAGTCGGCTGCCTT       |
| PYBA-CFEM81-R | GGTACCGGGCCCCCCCCTCGATGAGGAGAGCGGCAA      |
| PYBA-CFEM85-F | caATTGGAGCTCCACCGCATGCGATCCTCATTGTC       |
| PYBA-CFEM85-R | GGTACCGGGCCCCCCCCTCGAGAGCGGCAACGATGGCC    |
| PYBA-CFEM87-F | caATTGGAGCTCCACCGCATGAAGTCAACTCTGCTCCTCTT |
| PYBA-CFEM87-R | GGTACCGGGCCCCCCCCTCCAGGGCAGCCAACAGCCC     |
| PYBA-CFEM88-F | caATTGGAGCTCCACCGCATGAAGCTTACCGCTGTTCT    |
| PYBA-CFEM88-R | GGTACCGGGCCCCCCCCTCAAGTCCCTTCTCGATCCTG    |
| PYBA-CFEM89-F | caATTGGAGCTCCACCGCATGAAGTTCCTCGCCATTGC    |
| PYBA-CFEM89-R | GGTACCGGGCCCCCCCCTCCAGAGCCAACGCCGCGAA     |
| PYBA-CFEM90-F | caATTGGAGCTCCACCGCATGAAGTTCACTGCTGTCGC    |
| PYBA-CFEM90-R | GGTACCGGGCCCCCCCCTCGAGAGCCAGGGCACCGAT     |
